# Supplementary material for: Time-Course Global Expression Profiles of Chlamydomonas reinhardtii during Photo-Biological H2 Production
Source: PLoS One. 2011 Dec 29;6(12):e29364. doi: 10.1371/journal.pone.0029364 (PMC3248568; doi:10.1371/journal.pone.0029364)
Supplement: Table S1 — A complete list of all microarray data. Expression relative to T0 is given for both strains and all examined time points. GeneID numbers correspond to those contained in the gal file (http://www.chlamy.org/galfile.xls, [50]) and heat map group assignments (Figure 4) for each gene are given as well. An increase in the mRNA abundance (Tn/T0>1) is indicated by red highlighting and a decrease (Tn/T0<1) by green highlighting. Available functional assignments (column “Annotation”) are given and were used for sorting (column “Group”). (XLS) [file pone.0029364.s002.xls]

## Sheet: Tabelle1
GeneID: Gene Identification as shown in the microarray gal file (http://www.chlamy.org/galfile.xls)
Heat map group: expression pattern group from hierarchically clustered data
Red highlight: increased transcript abundance
Green highlight: decreased transcript abundance
ND: no differential expression
NA: data not available
			Stm6Glc4				WT
GeneID	Heat map group	Annotation	T1/T0	T2/T0	T3/T0	T4 /T0	T1/T0	T2/T0	T3/T0	T4/T0	T5/T0	T6/T0	Group
634.C	2	AOT4, polyamine/amino acid transporter	2.20327	2.03595	1.50594	1.83496	3.2599	2.62669	3.73105	ND	ND	2.56472	amino acid metabolism
1362.C	10	Glycyl tRNA synthetase	0.846057	ND	0.404309	0.478316	ND	ND	ND	ND	ND	ND	amino acid metabolism
8908.D	11	BCA1, branched chain amino acid aminotransferase	0.612318	0.662179	0.526555	0.472379	ND	ND	0.590538	0.493429	0.536175	0.467863	amino acid metabolism
9665.E	2	OGD2, dihydrolipoamide succinyltransferase, oxoglutarate dehydrogenase E2 component	1.83783	1.24303	1.38287	1.62689	1.26064	ND	1.22389	3.92393	2.03663	2.9222	amino acid metabolism
263.A	4	ODC1, ornithine decarboxylase 1	ND	1.49277	1.50583	ND	1.99467	2.54281	ND	ND	0.746322	0.691357	amino acid metabolism
6901.C	5	OAT1, ornithine aminotransferase	ND	ND	2.92788	2.33477	2.90251	3.67944	ND	4.23777	3.77955	3.58569	amino acid metabolism
139.A	1	GAP1, glyceraldehyde 3 phosphate dehydrogenase	2.55637	2.46498	ND	1.8247	2.88918	1.84524	ND	2.48389	ND	ND	carbon metabolism
7973.D	1	GPD2, Glycerol-3-phosphate dehydrogenase/dihydroxyacetone-3-phosphate reductase	3.05674	ND	ND	ND	3.4718	2.79872	ND	ND	ND	ND	carbon metabolism
6458.C	2	Glycoside hydrolase, carbohydrate-binding protein	1.74868	1.68653	1.58698	1.41775	2.26649	3.8579	2.4967	ND	ND	ND	carbon metabolism
3991.C	2	Glycoside hydrolase	3.78437	2.72831	3.34023	3.64075	2.56929	2.90068	2.632	3.60218	4.05096	4.30574	carbon metabolism
962.C	2	FUM2, fumarate hydratase	1.31978	1.55443	2.31376	2.3348	ND	ND	ND	ND	1.6824	1.71457	carbon metabolism
337.A	4	GND1b, 6 phosphogluconate dehydrogenase (decarboxylating), cyto	ND	1.42569	ND	1.28717	2.67774	3.00829	ND	2.10493	2.09135	1.99879	carbon metabolism
820.C	5	PAT1, Phosphate acetyltransferase	ND	ND	1.35892	1.2983	ND	ND	ND	3.54115	ND	2.71594	carbon metabolism
5879.C	7	Glycerol 3 phosphate dehydrogenase	ND	ND	ND	ND	1.87223	ND	3.7643	ND	ND	ND	carbon metabolism
5269.C	7	TPS2, trehalose 6 phosphate phosphatase	ND	ND	ND	ND	2.00862	2.59427	ND	ND	2.6425	ND	carbon metabolism
403.A	9	MDH5, NADP Malate Dehydrogenase	ND	ND	0.604756	ND	ND	ND	ND	0.486815	0.362648	0.520826	carbon metabolism
1457.C	9	GWD2, Cre07.g332300	ND	ND	ND	0.759219	2.60375	4.00108	ND	ND	1.73731	1.56584	carbon metabolism
7576.D	11	FBA1, fructose 1, 6 bisphosphate aldolase	0.531996	0.438912	0.385598	0.350061	0.65739	0.684926	ND	0.390017	0.483399	0.48355	carbon metabolism
9025.E	12	Fructose 2 6 bisphosphatase or Phosphoglycerate mutase	0.627594	ND	0.357854	0.376702	ND	ND	ND	ND	1.6082	ND	carbon metabolism
997.C	5	CCD1, carotenoid oxygenase	1.36045	ND	1.60742	1.87637	1.44971	1.28919	1.66138	3.03986	2.19688	3.07777	carotene biosynthesis
4116.C	7	CCD1, carotenoid oxygenase	ND	ND	ND	ND	ND	ND	4.47274	ND	ND	ND	carotene biosynthesis
508.B	2	CYCAB1, A/B type cyclin	3.09932	2.31911	3.00739	2.88573	2.64036	2.60249	2.3517	3.11416	3.53768	3.12329	cell cycle control
530.B	8	Multiple matches MGE1 and CYCB1, mitochondrial grpE type co chaperone of the HSP70 system or Cyclin B 1	ND	ND	ND	ND	ND	ND	0.436064	0.430103	ND	0.336336	cell cycle control
519.B	8	CYCA1, A type cyclin	ND	ND	ND	ND	ND	ND	0.498669	ND	0.395585	0.40288	cell cycle control
3403.C	9	NSG13, nitrogen starved gametogenesis 13	2.61686	ND	0.382736	0.357335	ND	ND	0.131941	ND	0.133261	0.176289	cell cycle control
3202.C	9	SMC5B, Structural Maintenance of Chromosomes protein 5B	0.738634	0.430707	0.470892	ND	ND	ND	ND	ND	ND	ND	cell cycle control
9165.E	1	GP3 cell wall glycoprotein or XM_001694426	2.73699	ND	ND	ND	ND	ND	0.44528	0.404894	0.405488	0.344788	cell wall maintenance
2836.C	5	GTR19, glycosyl transferase, beta glucan synthase	ND	ND	1.21966	ND	0.700356	ND	ND	0.582802	0.596348	0.360056	cell wall maintenance
14.A	8	GP2, hydroxyproline rich glycoprotein component of the outer cell wall	ND	ND	ND	ND	ND	ND	0.291287	0.266577	0.289368	0.335813	cell wall maintenance
2719.C	8	PHC12, cell wall protein pherophorin C12	ND	ND	ND	ND	ND	ND	0.384511	ND	0.483904	0.457892	cell wall maintenance
7391.C	9	PHC2, cell wall protein pherophorin C2	ND	ND	ND	0.585167	ND	ND	0.326712	0.319724	0.276286	0.29959	cell wall maintenance
4463.C	10	PHC3, cell wall protein pherophorin C3	ND	ND	0.269789	0.550307	ND	ND	ND	0.413802	0.203168	0.269761	cell wall maintenance
1573.C	10	ISG C2, hydroxyproline rich cell wall protein	ND	ND	0.310184	0.475087	ND	ND	0.226863	0.287319	ND	0.391969	cell wall maintenance
1537.C	2	HMOX2, Heme oxygenase	2.04373	1.622	2.05938	2.23206	1.59832	ND	1.82335	5.1457	2.9961	3.74462	chlorophyll metabolism
2146.C	9	GGR, geranylgeranyl reductase, chl.	1.93077	0.683675	0.51172	ND	ND	2.2983	ND	ND	0.187488	0.258038	chlorophyll metabolism
3988.C	3	LCI22, low CO2 inducible protein	1.70928	ND	1.4553	ND	5.28689	7.8884	2.79456	ND	ND	ND	CO2 uptake / CCM
9652.E	4	LCI34, low CO2 inducible protein	ND	5.07941	2.52771	2.46083	ND	ND	0.643582	ND	1.26171	ND	CO2 uptake / CCM
307.A	5	CAH1, carbonic anhydrase	ND	ND	ND	1.30101	0.366633	0.199747	0.0826128	0.0666627	0.0898957	0.0981922	CO2 uptake / CCM
9154.E	6	LCI24, low CO2 inducible membrane protein	ND	2.07329	ND	ND	ND	ND	0.602385	0.376568	ND	ND	CO2 uptake / CCM
266.A	7	LCR1, low CO2 response regulator	ND	ND	ND	ND	2.3293	2.92399	ND	ND	0.377726	0.334106	CO2 uptake / CCM
38.A	8	CAH2, Carbonic anhydrase, alpha type, periplasmic	ND	ND	ND	ND	0.679596	0.619352	0.487691	0.434628	0.473807	0.474849	CO2 uptake / CCM
6737.C	8	LCI9, low CO2 inducible protein	ND	ND	ND	ND	ND	ND	ND	ND	0.169963	0.252873	CO2 uptake / CCM
335.A	9	LCIC, low CO2 inducible protein	ND	0.563853	ND	0.578378	ND	ND	ND	0.180238	0.275669	0.508073	CO2 uptake / CCM
285.A	9	LCI15, PRLI interacting factor L	ND	0.54317	ND	ND	ND	ND	0.700049	0.260916	0.358715	0.383972	CO2 uptake / CCM
91.A	9	CAH5 or CA1 beta carbonic anhydrase	ND	0.627832	ND	ND	ND	ND	ND	ND	0.12421	0.175971	CO2 uptake / CCM
477.A	9	LCI3, low CO2 inducible protein	ND	ND	0.380678	ND	0.498207	ND	0.557434	0.307504	0.298758	0.194624	CO2 uptake / CCM
240.A	11	LCI5, low CO2 inducible protein	0.564659	0.319918	0.236027	0.101745	0.234153	ND	ND	0.209134	0.244497	0.219608	CO2 uptake / CCM
19.A	1	CTH1B, Copper target 1 protein	1.52781	ND	ND	ND	ND	1.66451	ND	ND	0.313914	0.30403	chlorophyll metabolism
254.A	4	PFL1, pyruvate formate lyase	ND	6.98816	2.35766	2.26271	2.32092	2.32417	ND	4.95214	2.78468	1.20226	Fermentation
516.B	2	WEE1, CDK inhibitory kinase	2.89538	1.72946	2.52247	1.56917	2.46423	2.48145	2.2304	2.96038	3.5753	3.13114	flagellar associated proteins
7663.D	2	FAP151, Flagellar Associated Protein	1.72863	1.32278	1.65445	1.83085	1.56615	1.46985	1.37776	2.55557	2.31978	3.01748	flagellar associated proteins
6272.C	5	FAP218, Flagellar Associated Protein	ND	ND	ND	1.69679	ND	1.84165	1.80686	2.04121	2.57177	3.03969	flagellar associated proteins
3213.C	8	XM_001693893, flagella associated protein	ND	ND	ND	ND	ND	0.386463	0.395538	0.212822	0.269035	0.329004	flagellar associated proteins
4934.C	9	RSP7, Radial spoke protein 7	0.643442	0.644084	ND	ND	0.492129	0.321498	ND	ND	ND	0.605051	flagellar associated proteins
8656.D	11	FAP190, Flagellar Associated Protein	0.540347	0.705634	0.496525	0.344347	ND	ND	ND	ND	0.55075	0.428201	flagellar associated proteins
9909.E	11	FAP259, Flagellar Associated Protein	0.721093	0.569371	0.558718	0.403143	ND	ND	ND	0.646388	0.621213	0.584192	flagellar associated proteins
6837.C	11	FAP66, Flagellar Associated Protein	0.608302	0.506748	0.461648	0.348384	ND	ND	ND	ND	0.677881	0.569988	flagellar associated proteins
9097.E	11	FAP162, Flagellar Associated Protein	0.309282	0.265934	0.23428	0.260819	0.438184	0.527186	0.346284	0.393523	0.270425	0.361678	flagellar associated proteins
9401.E	2	HAP2, vanadium haloperoxidase	10.3216	2.87196	12.9014	10.4715	ND	NA	ND	NA	ND	53.2837	haloperoxidase
3629.C	2	PAP2 haloperoxidase like	8.53762	3.53558	8.15998	9.08552	2.774	ND	2.49585	4.79481	8.27333	8.21802	haloperoxidase
291.A	6	HSP70A	1.25145	6.81128	ND	1.72855	ND	ND	ND	ND	1.52822	ND	heat shock response
464.A	6	HSP70B	ND	1.81246	ND	ND	1.6211	2.29944	ND	0.499778	ND	ND	heat shock response
9317.E	6	HSP22F, heat shock protein	0.727342	2.87006	0.660652	ND	ND	ND	ND	1.20688	3.66672	4.52966	heat shock response
360.A	1	HON2, Histone H1	1.34492	0.847993	ND	ND	0.631206	0.537352	ND	ND	0.398521	0.567383	Transcription / Translation
7288.C	5	CPL1, Histone deacetylation protein	ND	ND	1.8565	1.89735	ND	ND	ND	ND	4.57103	4.8682	Transcription / Translation
4682.C	11	H2A, histone 2A	0.811001	0.844506	0.690253	0.71705	4.22799	4.3977	0.703681	0.542139	0.636293	ND	Transcription / Translation
359.A	4	HYD1, iron hydrogenase	ND	3.82072	1.73407	2.02251	0.760072	ND	ND	3.80229	1.98322	1.40515	H2 production
136.A	5	FOX1, multicopper ferroxidase	ND	ND	ND	1.33769	ND	ND	0.275201	ND	ND	ND	iron deficiency
3583.C	2	Deoxynucleoside kinase	3.41426	1.9499	1.86449	2.45627	1.82904	1.3543	ND	1.87979	2.14042	2.52956	kinase
1367.C	2	Ankyrin protein kinase	3.04877	1.57911	2.18513	2.1619	1.79794	1.51849	1.50497	3.84838	2.6345	3.80511	kinase
8029.D	2	ALK3, aurora like kinase	1.71495	1.56221	1.67106	2.04521	1.37821	1.34087	1.32562	2.53869	2.17831	2.53354	kinase
6015.C	5	Kinase like	ND	ND	3.38371	5.54995	ND	NA	NA	NA	11.1276	7.42198	kinase
2492.C	1	XM_001690830, Plant lipoxygenase	4.00343	2.73025	ND	ND	ND	0.675581	ND	0.172897	0.0867699	0.0437359	Lipid metabolism
9679.E	2	XM_001690766, Esterase/lipase/thioesterase	9.93102	4.35735	5.44415	4.50008	ND	NA	ND	ND	9.05468	11.1858	Lipid metabolism
9698.E	2	LCS, Long chain acyl-CoA ligase/synthetase	2.51928	1.69052	1.92043	2.46112	ND	1.83873	3.10891	ND	2.86052	1.90071	Lipid metabolism
2493.C	2	ABCA, ABC transporter	1.66845	1.96378	1.81931	1.70654	2.32564	3.19356	2.40474	ND	1.5268	ND	Lipid metabolism
8.A	9	DES6/FAD6, omega 6 fatty acid desaturase, chl. isoform	0.253057	0.290032	ND	0.677121	0.237909	0.338264	0.25996	0.260045	0.504512	ND	Lipid metabolism
7494.C	9	XM_001690830, Plant lipoxygenase	ND	ND	0.68021	ND	ND	ND	0.547957	0.436633	0.303423	0.305911	Lipid metabolism
166.A	11	ACP2, acyl carrier protein	0.646007	0.346693	0.250996	0.216563	0.380227	ND	0.515402	0.196112	0.197404	0.305976	Lipid metabolism
9104.E	11	MCT, Manolyl-coA, acyl-carrier protein acyl transferase	0.474081	0.424283	0.538149	0.419289	0.482582	0.418645	0.42813	0.16651	0.230583	0.309346	Lipid metabolism
9505.E	11	enoyl acyl carrying protein reductase containing NAD binding domain	0.875772	0.776475	0.803778	0.828182	0.73845	ND	0.745931	0.393845	0.645177	0.562583	Lipid metabolism
3844.C	12	similar to CGLD15 (TAG lipase-like), Cre03.g155250	0.475647	ND	ND	ND	ND	0.526394	ND	ND	2.25061	2.89514	Lipid metabolism
205.A	4	AMT1B, ammonium transporter	ND	1.44921	1.61372	2.01666	1.53812	1.37309	1.64617	2.89419	2.16741	3.02928	N assimilation
182.A	9	NII1, Nitrite reductase	ND	ND	0.310937	ND	NA	ND	NA	NA	NA	NA	N assimilation
199.A	9	AMT1A, Ammonium transporter	ND	ND	ND	0.794246	3.04336	3.83633	ND	ND	ND	ND	N assimilation
6793.C	2	THB2, truncated hemoglobin	1.85816	1.57285	1.89402	2.1176	1.74604	1.98786	1.752	2.58089	2.41566	2.84445	Oxygen-dependent enzymes
6696.C	2	CTR3, copper transport	1.77272	2.94745	2.58661	2.65685	ND	ND	ND	4.17289	2.69853	3.09297	Oxygen-dependent enzymes
9013.E	4	XM_001692512	ND	5.09559	1.89301	2.04196	0.640124	ND	ND	7.10417	1.84027	2.34061	Oxygen-dependent enzymes
9635.E	4	P4H, prolyl 4 hydroxylase containing 2OG-FeII oxygenase CHLREDRAFT_114525	ND	8.70286	3.55656	3.29847	ND	ND	ND	6.5249	4.11821	3.98523	Oxygen-dependent enzymes
9373.E	4	XM_001701276	ND	30.2468	16.0388	16.1729	0.771612	ND	1.8355	34.3351	22.5689	24.9862	Oxygen-dependent enzymes
26.A	4	CRD1, copper response defect 1 protein	ND	3.14121	2.1587	2.61957	ND	ND	ND	4.84609	ND	ND	Oxygen-dependent enzymes
311.A	5	CPX1, coproporphyrinogen III oxidase	ND	ND	3.60786	4.17744	ND	ND	1.92114	4.99569	3.46553	4.52359	Oxygen-dependent enzymes
483.A	10	ULP1, uncharacterized lumenal polypeptide	ND	0.53342	0.460848	0.472918	ND	ND	ND	0.370304	0.190355	0.202252	Oxygen-dependent enzymes
6838.C	9	Copper type II ascorbate dependent monooxygenase, DBH like	ND	0.717905	0.491768	0.358443	0.773354	ND	ND	ND	0.53906	0.545661	Oxygen-dependent enzymes
5659.C	1	XM_001694739, Peptidase M	1.71567	ND	ND	ND	0.538935	0.566087	0.246668	0.277581	ND	0.384959	Proteases
8770.D	1	LHCSR3, stress related protein LHC protein	2.07331	1.38625	ND	ND	12.6556	21.3905	2.60013	ND	ND	ND	Photosynthesis
350.A	2	LHCBM9, PSII light harvesting protein	136.259	66.6303	84.0322	80.3838	183.966	222.02	184.491	203.132	241.677	49.7408	Photosynthesis
458.A	5	psbA intron 2 accumulation indicates lower translation	ND	ND	2.17758	2.24487	ND	ND	ND	5.03488	3.07846	2.08733	Photosynthesis
251.A	7	LHCSR1, stress related protein LHC protein	ND	ND	ND	ND	1.77411	3.26442	2.09755	2.51951	4.09825	4.2731	Photosynthesis
213.A	8	LHCA5, PS I light harvesting protein	ND	ND	ND	ND	ND	ND	0.5273	0.337505	0.372978	0.356008	Photosynthesis
6203.C	9	RMT2, Rubisco small subunit N methyltransferase	ND	0.752503	ND	ND	1.69093	2.55223	ND	ND	ND	ND	Photosynthesis
352.A	9	PRK1, phosphoribulokinase	ND	0.712109	0.679944	ND	ND	ND	0.731849	0.366682	0.385524	0.364282	Photosynthesis
96.A	10	PSBP1, PSII oxygen evolving enhancer protein	1.19108	ND	0.435974	0.447248	ND	ND	ND	0.402846	0.165266	0.170547	Photosynthesis
217.A	10	LHCB5, PSII minor chlorophyll a b binding protein	ND	ND	0.342882	0.437193	0.600688	0.395029	0.447967	0.312893	ND	0.293531	Photosynthesis
69.A	10	PSAH (P28), subunit H of PSI	ND	ND	0.613533	0.669201	ND	0.600232	0.478896	0.304301	0.366891	0.366223	Photosynthesis
482.A	10	PSAD, Photosystem I reaction center subunit II, 20 kDa	ND	ND	0.638483	0.686615	ND	0.662577	0.583301	0.561378	0.2776	0.266171	Photosynthesis
159.A	10	LHCB4, PSII minor chlorophyll a b binding protein	ND	0.541178	0.202067	0.235696	0.684801	0.731696	ND	0.164889	0.0725689	0.0627917	Photosynthesis
345.A	10	PSAF, photosystem I reaction center subunit III	ND	0.597827	0.272273	0.483844	0.620064	0.396733	0.385977	0.241839	0.124804	0.149263	Photosynthesis
442.A	10	PSAE, photosystem I 8.1 kDa reaction center subunit IV	ND	0.411487	0.218565	0.25409	0.613548	0.376911	ND	0.242784	0.0561119	0.0761534	Photosynthesis
371.A	10	LHCA1, PS I light harvesting protein	ND	0.609658	0.533839	0.528848	0.545846	0.385918	ND	ND	0.217022	0.250493	Photosynthesis
93.A	10	LHCA4, PS I light harvesting protein	ND	0.672098	0.624768	0.628372	ND	ND	ND	0.36032	0.371411	0.315472	Photosynthesis
250.A	10	PSAK, photosystem I reaction center subunit psaK	ND	0.545648	0.437913	0.520659	ND	ND	0.573295	0.326834	0.288846	0.296007	Photosynthesis
8094.D	10	PSAL, Photosystem I reaction center subunit XI	ND	0.554497	0.417464	0.494041	ND	0.596844	0.389205	0.277344	0.178352	0.21735	Photosynthesis
463.A	10	PCY1, plastocyanin, chl. precursor	ND	0.40631	0.421625	0.355439	0.483918	0.424829	0.24696	0.16547	0.121579	0.157005	Photosynthesis
84.A	10	PETM, cytochrome b6f complex	ND	0.534473	0.578124	0.641163	0.309444	0.320993	0.439441	0.322462	0.29559	0.305539	Photosynthesis
328.A	11	TRXm, Thioredoxin m	0.801778	0.577684	0.436319	0.516101	ND	ND	0.554702	0.466759	0.469423	0.512913	Photosynthesis
262.A	11	LHCA7, PS I light harvesting protein	0.671973	0.237858	0.121329	0.156926	0.3858	0.288785	0.264505	0.120374	0.0735	0.0815819	Photosynthesis
343.A	11	ATPD, chloroplast ATP synthase delta chain	0.627386	0.6096	0.452653	0.470144	0.51663	0.533999	0.452852	0.457751	0.419976	0.319037	Photosynthesis
9305.E	11	TEF14, thylakoid lumenal protein	0.49311	0.344043	0.369884	0.343501	0.512083	ND	0.336785	0.255295	0.246421	0.276288	Photosynthesis
243.A	11	PETF, apoferredoxin, chl. precursor	0.576001	0.26446	0.301254	0.244094	0.25638	0.374437	0.220603	0.108115	0.0813297	0.135698	Photosynthesis
155.A	11	PETC, cytochrome b6f complex subunit	0.469734	0.201499	0.277784	0.117166	0.418337	0.697448	0.376581	0.118431	0.102445	0.136585	Photosynthesis
45.A	11	RBCS2B, ribulose 1, 5 bisphosphate carboxylase/oxygenase small subunit 2	0.623078	0.320411	0.363389	0.137312	0.175024	0.375291	0.201502	0.0876081	0.0636237	0.138616	Photosynthesis
129.A	11	SEBP1, sedoheptulose 1, 7 bisphosphatase	0.54602	0.381448	0.373724	0.446158	0.390438	0.469582	0.455462	0.211992	0.254087	0.341213	Photosynthesis
9625.E	8	AGG2, membrane protein	ND	ND	ND	ND	0.499699	0.392833	0.332888	0.486053	0.51528	0.398607	other
5435.C	11	N acyltransferase superfamily	0.506241	0.466696	0.353174	0.282248	ND	ND	ND	ND	0.565052	0.524342	Posttranslational modifications
9360.E	4	ThiJ/PfpI	1.30708	1.70288	ND	2.49806	1.62526	2.0112	ND	0.767996	2.1772	2.57539	Protease
9146.E	5	Peptidase S8 and S53, subtilisin, kexin, sedolisin	ND	ND	1.16488	1.45596	1.68723	1.52723	ND	2.34586	2.21222	2.46196	Protease
2786.C	7	RSEP2, intramembrane metalloprotease	ND	ND	ND	ND	ND	ND	ND	1.84581	2.30961	2.79651	Protease
4348.C	7	CLPX, ATP-dependent clp protease ATP-binding subunit	ND	ND	ND	ND	2.78932	3.24956	1.83165	ND	ND	1.50764	Protease
8925.E	10	POA1, 20S proteasome alpha subunit A	ND	0.685516	0.766958	0.752884	ND	0.653113	ND	0.43997	0.402619	0.388419	Protease
67.A	5	UBQ2, Bi-ubiquitin	ND	1.79735	6.39342	6.4727	ND	1.6875	ND	ND	2.90099	3.25987	Protein degradation
7157.C	5	Cre03.g155350, Pyridoxamine 5'-phosphate oxidase	1.68169	ND	4.51462	3.29085	ND	NA	ND	NA	ND	3.24954	metabolism of vitamins and cofactors
1311.C	7	Trans-2-enoyl coA reductase like	ND	ND	ND	ND	2.01895	2.92239	ND	2.15906	2.51748	2.45928	Lipid metabolism
5365.C	2	UCP2, uncoupling protein, mit	2.25197	1.96461	2.19364	2.58221	1.62664	1.60464	1.55786	2.3555	2.1496	2.31781	Mitorespiration
443.A	2	AOX1, alternative oxidase, isoform 1	1.64232	2.56434	2.74152	3.21713	2.14541	2.52522	ND	ND	2.15664	2.3654	Mitorespiration
9477.E	10	ATP9A, F1F0 ATP synthase subunit 9, isoform A	1.12882	ND	0.577805	0.538432	1.58931	ND	ND	ND	0.31896	0.388088	Mitorespiration
4701.C	10	ATP4, Mitochondrial F1F0 ATP synthase, delta subunit	ND	0.542118	0.408737	0.4503	ND	ND	ND	ND	0.384406	0.36549	Mitorespiration
168.A	10	NUO8, NADH:ubiquinone oxidoreductase subunit 8	ND	0.607267	0.559036	0.471069	0.516699	ND	0.656038	0.534217	0.356987	0.480248	Mitorespiration
347.A	1	GPXH (GPX5), glutathione peroxidase	2.69781	3.27122	ND	ND	3.61914	5.37494	2.26507	ND	ND	ND	ROS defense
440.A	10	PRX1, 2 cys peroxiredoxin, thioredoxin dependent peroxidase	ND	ND	0.377493	0.441137	ND	ND	0.458022	0.389997	0.399333	0.360516	ROS defense
9169.E	1	ACA1, calmodulin binding calcium transporting ATPase	2.28916	2.13048	ND	ND	2.17341	3.62909	2.1441	3.78476	3.02541	2.17624	Signaling
4332.C	3	PSL1, signal peptide peptidase, eukaryotic type	1.70904	ND	1.42662	1.78097	1.47827	ND	ND	2.48643	2.5224	2.72748	Signaling
4472.C	8	ACA2, plasma membrane calcium ATPase	ND	ND	ND	ND	0.545682	0.288935	ND	ND	0.593444	0.394137	Signaling
4565.C	8	Adenylyl cyclase like	ND	ND	ND	ND	ND	ND	0.447418	0.365138	ND	0.376054	Signaling
9142.E	11	GBA1, GTP binding protein TypA	0.692377	0.63379	0.6079	0.680039	0.536327	0.627504	ND	0.308063	0.485616	0.597175	Signaling
249.A	8	TUB2, beta tubulin 2	ND	ND	ND	ND	0.498185	0.216428	0.333407	0.263229	0.285888	0.253189	Cell architecture
73.A	1	ARS1, arylsulfatase	4.79659	ND	ND	ND	5.29739	2.71636	1.80478	1.94359	1.84387	5.07879	Sulfur acquisition and recycling
7570.D	1	ATS2, ATP sulfurylase	1.56	1.15844	ND	ND	1.87131	1.9558	1.9575	2.25625	2.43792	2.04131	Sulfur acquisition and recycling
382.A	2	ARS1, arylsulfatase	8.47184	2.7224	2.45715	2.31481	9.03093	5.8916	3.01557	4.5909	3.67596	5.43529	Sulfur acquisition and recycling
8327.D	2	SLT1, animal type sulfate transporter	5.33029	2.28694	2.51703	1.99388	11.517	12.6824	10.1731	9.89546	8.4001	9.78636	Sulfur acquisition and recycling
9725.E	2	TAUD1, taurine dioxygenase	3.40878	1.55176	1.9516	1.70666	3.416	3.57995	2.25375	4.22465	3.62368	3.8806	Sulfur acquisition and recycling
506.B	2	RDP3, rhodanese	5.59642	3.69327	2.19159	2.28382	12.6225	20.2865	7.42118	10.8136	6.981	6.44607	Sulfur acquisition and recycling
7991.D	2	SLT1, animal type sulfate transporter	12.3773	12.0431	6.15022	4.1597	40.2803	49.5954	45.4412	32.7057	34.2722	34.2396	Sulfur acquisition and recycling
3414.C	2	SBD1, selenium binding protein	7.76711	3.8164	4.9403	4.70928	8.76693	7.65577	6.32408	7.72264	10.077	10.3878	Sulfur acquisition and recycling
6697.C	2	XM_001694976	5.26172	2.83556	3.82892	2.63839	1.77365	1.88132	ND	2.95205	4.46257	3.2803	Sulfur acquisition and recycling
167.A	2	ECP88, extracellular protein	17.8963	9.27017	18.7981	13.9933	15.7517	13.2407	11.2384	35.7854	25.8523	24.5288	Sulfur acquisition and recycling
429.A	2	SAT1b, serine acetyltransferase	12.8102	6.36125	9.52822	8.9563	17.9366	20.096	14.306	11.7715	20.3225	18.5853	Sulfur acquisition and recycling
447.A	2	OASTL4a, O acetylserine(thiol) lyase	7.37191	6.1607	6.62845	7.45957	13.807	13.0526	4.24264	6.96418	9.03564	7.0246	Sulfur acquisition and recycling
4892.C	2	ANK15, ankyrin repeats protein of unknown function	2.83024	2.26437	2.16824	2.39844	3.2957	6.22686	6.61932	ND	5.89398	4.03319	Sulfur acquisition and recycling
9099.E	2	SLT2, animal type sulfate transporter	21.6803	7.11849	19.3448	22.3934	31.7823	73.4961	66.8506	84.517	41.0886	37.7267	Sulfur acquisition and recycling
7885.D	2	ECP56, extracellular protein containing DUF1214	1.71288	1.34725	1.68347	1.66894	2.72834	2.63073	1.94381	2.47374	2.16145	2.33839	Sulfur acquisition and recycling
8577.D	2	SIR1, ferredoxin sulfite reductase	4.32983	5.89618	3.83339	7.05008	9.53251	10.9052	10.8139	12.151	21.9276	28.1276	Sulfur acquisition and recycling
3620.C	2	SIR1, ferredoxin sulfite reductase	2.36131	2.42536	2.98346	3.18072	4.70709	6.44627	4.25186	5.58631	9.34726	8.40484	Sulfur acquisition and recycling
432.A	2	ECP76, extracellular protein	6.73663	6.547	10.9817	8.08332	5.63736	7.76145	7.16581	12.4705	11.1475	12.1889	Sulfur acquisition and recycling
7652.D	2	SUMT1, SAM dependent uroporphyrinogen III methyltransferase, siroheme synthase	1.83498	1.79586	2.31669	1.92607	ND	ND	2.19534	6.37316	3.43564	3.32695	Sulfur acquisition and recycling
9812.E	3	LPB1, low phosphate bleaching protein	1.99027	1.86961	1.80692	ND	3.6363	5.0294	3.84738	8.294	3.72136	2.9879	Sulfur acquisition and recycling
9674.E	4	Sulfite reductase (ferredoxin)	ND	1.78641	2.13455	ND	2.19073	2.06536	ND	3.46659	3.42613	3.25051	Sulfur acquisition and recycling
9261.E	1	SPL7, splicing factor	1.59143	ND	ND	1.54359	2.06074	3.19977	1.48093	7.47636	2.22243	2.17648	Transcription/Translation
9120.E	5	Eukaryotic initiation factor 4A like protein	ND	ND	3.07862	ND	1.76787	2.21751	ND	1.50214	3.90438	2.42562	Transcription/Translation
5127.C	7	Global transcription factor	ND	ND	ND	ND	ND	2.8047	ND	2.85201	ND	2.40549	Transcription/Translation
5503.C	11	Transcription initiation factor TFIID	0.594691	0.397276	0.306945	0.358297	0.512396	0.64223	0.408904	0.236159	0.199439	0.252177	Transcription/Translation
5229.C	11	Transcription factor group C	0.669499	0.627726	0.54998	0.433061	0.69764	0.713825	ND	0.515351	0.505959	0.47884	Transcription/Translation
2487.C	11	EIF4G, initiation factor	0.602402	0.526604	0.450742	0.318147	ND	ND	0.664152	ND	0.568252	0.510477	Transcription/Translation
9508.E	11	EEF1, eukaryotic translation elongation factor 1 alpha 2	0.46641	0.409941	0.335334	0.26195	ND	ND	0.567844	0.619693	0.676954	0.633099	Transcription/Translation
2269.C	11	CCAAT binding transcription factor subunit A	0.586155	0.646753	0.558976	0.447022	ND	ND	0.679254	0.515874	0.488604	0.37741	Transcription/Translation
9459.E	8	RPL15, Ribosomal protein L15, component of cytosolic 80S ribosome and 60S large subunit	ND	ND	ND	ND	1.2101	ND	ND	0.724275	0.697891	0.41248	Transcription/Translation
445.A	11	CSP41b, chl. ribosome associated protein RAP38	0.302678	0.230383	0.198458	0.302025	0.470815	0.313029	0.242675	0.2633	0.273807	0.322619	Transcription/Translation
13.A	11	GBP1, RNA binding protein	0.482366	0.389642	0.363045	0.434101	ND	0.636093	0.435155	0.273642	0.381782	0.423026	Transcription/Translation
4262.C	2	RABF1, small Rab related GTPase	1.51581	1.48345	1.56002	1.63274	1.45142	1.93024	1.80265	2.27733	2.43607	2.39534	Transporter
5583.C	5	MTP3, cation efflux transporter membrane protein	ND	ND	2.73357	1.72708	1.84734	2.04175	ND	2.90385	ND	1.94653	Transporter
2440.C	7	ZIP6, ZIP family transporter	ND	ND	ND	ND	ND	ND	ND	ND	5.59377	ND	Transporter
8048.D	7	BET5, Component of TRAPP complex	ND	ND	ND	ND	6.7309	5.77623	0.592358	ND	0.389734	ND	Transporter
21.A	9	HLA3, low CO2 iducible ABC transporter	0.623787	ND	0.562381	ND	4.92366	4.29168	ND	0.0999226	0.0706667	0.221641	Transporter
7268.C	11	SEC61B, SEC61 beta subunit of ER translocon	0.768261	0.764652	0.561389	0.421278	0.784792	ND	0.66868	0.586712	0.558169	0.448803	Transporter
6247.C	1	XM_001690307	2.92666	1.73212	ND	1.50843	ND	ND	ND	ND	2.61558	2.08601	Transporter
504.B	1	Cre01.g015250, DNA polymerase	2.37468	2.439	ND	ND	ND	5.38398	ND	ND	ND	1.76287	Transporter
476.A	1	SYP6, Qc SNARE protein, Tlg1/Syntaxin 6 family	1.89569	3.03515	ND	ND	ND	ND	ND	ND	ND	0.262222	Transporter
1171.C	1	Cre12.g520000	1.33448	ND	ND	ND	2.1697	3.0872	ND	ND	3.22451	ND
2056.C	1	Cre11.g469100	1.78343	ND	ND	1.23332	2.44156	3.59081	ND	ND	2.02086	2.01858
9010.E	1	Serine/threonine protein phosphatase	1.53474	ND	ND	1.27722	1.73856	2.46969	2.37406	ND	ND	ND
3119.C	1	CGL28, RNA binding protein Splicing factor 3b, subunit 4	1.70868	ND	ND	1.54107	ND	ND	ND	24.4967	ND	2.88648
7506.C	1	XM_001689447	1.56145	ND	ND	1.89954	ND	ND	2.39852	ND	2.25684	2.96443
9393.E	1	Cre02.g084400, prolyl 4 hydroxylase alpha subunit	1.22595	ND	ND	1.57396	ND	ND	ND	3.90315	1.57395	1.75743
991.C	2	XM_001697495	2.1273	1.81284	1.63723	1.83848	1.51064	1.39487	1.35162	2.05022	1.97471	2.19673
4383.C	2	Cre12.g535250	2.13587	1.4449	1.83658	1.79449	1.57074	1.44192	1.50236	2.28302	2.3824	2.2675
5436.C	2	XM_001691009, Hypothetical protein	2.62357	1.8256	2.75442	2.22252	3.68339	3.65343	4.80279	51.4432	8.51982	7.55757
3081.C	2	NAD-dependent epimerase/dehydratase	3.93527	2.31774	3.76068	3.01654	10.3432	10.1292	5.74771	10.6587	10.6089	8.38577
4343.C	2	Cre02.g113500	1.99962	1.53331	1.95949	1.75407	1.64345	ND	2.1934	3.22388	2.12724	2.97556
6657.C	2	Short chain dehydrogenase	2.72014	2.18285	2.52307	2.40405	2.37798	2.49337	2.58317	3.11304	3.49106	3.4074
4488.C	2	Cre10.g440000	3.02281	2.12972	2.66853	2.80097	1.75215	ND	2.09597	3.29264	2.59821	3.08153
9249.E	2	PWR1 domain	2.50142	1.93293	2.27171	2.33565	6.88438	10.2157	3.41242	4.38582	3.95431	3.7545
572.C	2	Not found	2.26767	2.02381	1.94811	2.13079	1.60722	ND	1.74353	ND	2.52279	2.98959
9445.E	2	XM_001698103	2.18901	2.0095	2.32375	1.87701	2.7068	2.76356	2.01618	2.73198	2.70291	2.59632
5751.C	2	Hypothetical protein	2.34058	1.97269	2.41532	2.51864	1.68264	ND	1.43742	2.35583	2.17822	2.27561
3819.C	2	Hypothetical protein	1.98239	1.67737	2.1153	2.17108	1.77869	1.7236	1.53194	2.42672	2.6939	2.84006
8189.D	2	Hypothetical protein	2.28167	1.63173	2.05878	2.49686	1.53895	1.43777	1.60662	4.62281	2.59956	3.42159
8950.E	2	Cre04.g225550	2.13272	1.66763	1.89897	2.18535	1.59803	1.62256	2.29266	3.70341	2.65523	3.88618
3546.C	2	Hypothetical protein	2.03729	1.73113	1.88032	2.41952	1.56592	1.51494	1.86283	3.41934	2.42769	3.36563
2810.C	2	Cre05.g235550	1.75279	1.50047	1.64016	1.89185	1.73914	1.73629	1.72455	2.97735	2.63933	2.91837
9282.E	2	Cre02.g137350,	1.74056	1.46758	1.65769	1.94658	1.64944	1.39799	1.37502	4.03147	2.60698	2.87985
4924.C	2	Not found	1.73257	1.45764	1.59699	1.88777	1.35905	1.37646	1.66185	3.48953	2.47761	3.58138
4360.C	2	Cre06.g285500	1.7634	1.59271	1.68304	1.90449	1.60011	1.46768	1.65451	3.02775	2.36982	3.03965
2774.C	2	XM_001698257	1.75759	1.57077	1.67877	1.81841	1.38114	1.35241	ND	ND	2.18078	2.9839
4686.C	2	Not found	2.32453	1.66983	1.81382	2.30969	1.62897	ND	1.80872	2.19641	2.72706	2.52668
8787.D	2	Cre08.g371000, leucin rich repeat	2.07228	1.54417	1.60975	2.08679	1.4516	1.37194	1.31715	2.87584	2.37324	2.78111
2531.C	2	Cre19.g756500	2.67101	2.05063	2.00485	2.64148	2.20355	2.11809	2.02813	2.56476	2.61147	2.78781
7800.D	2	XM_001698239, no putative conserved domain	2.23322	1.76263	1.82324	2.08136	1.63757	ND	2.69497	4.41306	2.44041	2.42932
6981.C	2	Hypothetical protein	2.11135	1.62034	1.75235	1.96386	1.93219	1.73276	1.84269	2.57077	2.0397	2.57953
7019.C	2	XM_001699895 no putative domain	2.73606	1.86141	1.94419	2.40708	3.46669	4.93105	5.6877	2.08784	6.03197	3.12675
4050.C	2	Not found	1.85827	1.47486	1.46121	1.77016	1.59757	ND	1.71611	3.53147	2.77475	3.34115
6222.C	2	Cre01.g044250, calmodulin	2.12876	1.62019	1.63142	2.30131	1.2961	ND	1.44028	3.09075	2.14385	2.85834
6325.C	2	Hypothetical protein	2.22947	2.6434	2.01309	2.61539	1.56133	1.38183	1.38523	2.0818	2.407	2.15253
9743.E	2	XM_001700022	4.61465	5.09932	3.79436	5.17817	4.153	3.16625	2.55846	4.91636	4.04867	2.95037
7927.D	2	Cre16.g660050	1.86898	1.90889	1.76392	1.89072	ND	1.4751	1.38258	2.76528	2.05086	2.59124
7963.D	2	CGL41 domain	3.80289	4.4568	4.57705	4.5169	7.78429	ND	ND	ND	9.88642	6.9011
6280.C	2	Hypothetical protein	2.0283	2.59118	2.49676	2.78013	2.64596	2.1122	3.58514	9.71654	3.3462	1.90448
7381.C	2	Hypothetical protein	1.79194	1.7562	2.05485	1.95142	2.04064	2.17012	1.50332	2.12677	2.44183	2.54838
5395.C	2	PPR1, protein with 3 PPR repeats	2.05832	2.23095	2.86812	2.31048	1.58971	2.09521	2.52288	4.00441	3.33405	2.94753
1389.C	2	XM_001691138, no conserved domain	2.12836	2.36642	2.56599	1.69942	3.50173	5.38521	3.48613	3.82226	4.34788	3.92618
8365.D	2	YEE1, membrane protein	1.86199	1.73986	2.72159	1.89961	2.05187	4.38125	ND	ND	4.8795	4.87608
3336.C	2	ATPase domain	1.81999	1.35925	1.84843	2.5216	1.7071	1.94318	1.97853	2.79171	3.0343	3.48008
9713.E	2	XM_001700809	1.53459	1.50377	2.16769	2.91796	ND	ND	ND	ND	1.61099	2.03297
9284.E	2	Cre01.g024900, uncharacterized conserved protein	1.6597	1.48725	2.08127	2.12367	1.20009	ND	1.67288	1.55755	2.48637	3.4481
2275.C	2	Hypothetical protein	1.38411	1.3196	1.55082	1.74511	1.36939	1.26973	1.43661	3.21934	2.31255	2.65076
9012.E	2	Cre12.g499800,	1.58858	1.78529	2.23433	2.25148	ND	0.643673	ND	ND	2.92703	4.2491
6774.C	2	Cre10.g452850, no functional annotations	1.42873	1.70802	1.95749	2.2779	ND	ND	ND	26.6381	2.91322	3.205
5853.C	2	XM_001690786, Hypothetical protein with Myb_DNA binding domain	1.40918	1.82958	1.99544	2.44141	ND	ND	ND	ND	2.32931	2.17845
1356.C	2	CLR21	1.49316	1.98506	2.23466	2.0853	1.47614	1.82167	3.91547	2.45288	2.65284	3.36756
8187.D	2	Hypothetical protein	1.32301	1.58921	1.86712	1.61324	1.32432	ND	1.5174	3.98206	2.28634	2.85239
9338.E	2	Hypothetical protein	1.28741	2.14509	2.55995	2.20287	1.71601	1.86995	2.83694	3.13721	2.09879	2.2443
6400.C	3	Cre13.g604900,	2.91558	ND	2.84933	1.72229	ND	NA	ND	13.5586	4.17198	ND
4331.C	3	Hypothetical protein	2.62294	ND	2.25112	1.90814	2.01647	2.70829	2.75401	4.59182	3.22088	3.22535
4378.C	3	hydrolase like protein	2.07508	ND	1.70623	1.96735	1.51553	ND	1.95602	2.50192	2.44523	2.39587
4246.C	3	Hypothetical protein	1.71595	ND	1.61489	1.7715	1.76507	1.89247	1.58753	2.17827	2.29963	2.58656
5839.C	3	Cre74.g795250, serine carboxypeptidase	1.60934	ND	1.55238	1.88581	1.50517	ND	ND	4.70295	2.28756	2.5163
7197.C	3	Hypothetical protein	1.50462	ND	1.45793	1.66139	1.65385	ND	1.63	ND	2.09017	2.41325
4214.C	3	Cre12.g537250	1.69889	ND	1.28409	1.39247	3.50548	ND	2.78747	4.70241	1.87843	2.1248
2712.C	3	XM_001699679,	2.88501	2.03017	2.46388	ND	2.5724	ND	2.64266	3.45005	3.77121	ND
8105.D	3	Cre10.g425650	1.76401	1.53937	1.63642	ND	1.60328	1.5521	1.75416	8.01642	2.38733	3.34008
9786.E	3	Hypothetical protein	1.70187	ND	2.31884	ND	ND	ND	2.75837	8.12064	3.45265	3.04064
9059.E	3	Cre17.g731050, ABC transporter	1.42485	ND	1.47201	ND	ND	ND	5.9113	ND	ND	ND
2238.C	4	XM_001692513, no putative conserved domain	ND	10.8598	5.13115	3.48494	ND	ND	ND	12.5752	ND	ND
6982.C	4	XM_001690412, no conserved domain	ND	4.88071	3.11891	3.03358	ND	3.25992	ND	ND	3.85952	ND
6576.C	4	Cre01.g001100	ND	4.35916	2.79467	2.78127	1.86347	ND	1.54399	4.80209	2.53103	ND
5246.C	4	Cre13.g600700	ND	2.36907	1.98028	1.92647	ND	ND	ND	ND	10.8409	ND
6835.C	4	Hypothetical protein	ND	2.27436	2.18876	1.39716	ND	ND	ND	ND	ND	3.55825
2315.C	4	Cre02.g093850, leucine rich repeat protein	ND	1.6805	2.03323	2.29394	ND	ND	ND	ND	ND	ND
5727.C	4	XM_001698206	ND	2.31453	2.92701	2.95848	2.77756	10.2962	ND	8.97559	8.82629	7.32172
3078.C	4	Cre17.g723500	ND	1.68544	1.79862	2.06495	1.26033	ND	1.6213	2.4796	1.92589	2.49324
905.C	4	Cre16.g683450, nucleotidyl transferase	ND	2.01006	2.19003	2.42259	ND	3.75773	ND	ND	2.93995	ND
6493.C	4	Cre08.g374913	ND	1.40194	1.81193	2.05264	2.11668	ND	ND	1.90476	2.49929	2.55408
9141.E	4	XM_001691290	ND	1.5573	1.60411	ND	ND	0.465618	0.215816	0.442463	0.892342	ND
8493.D	4	Cre37.g784700, SECRETORY GRANULE PROTEOGLYCAN CORE PROTEIN	ND	2.74235	1.75905	ND	ND	1.83864	1.37584	1.60465	1.71223	1.29293
8852.D	4	Cre08.g361600	ND	2.06178	1.37565	ND	ND	3.02295	ND	2.35897	3.02611	2.3923
8566.D	4	Cre01.g021550	ND	1.50636	ND	1.66346	1.42214	ND	1.80362	3.00952	2.01874	2.60917
9319.E	4	XM_001692033, nickel chaperone for hydrogenase or urease	ND	1.66093	ND	1.8648	ND	ND	ND	2.38315	2.79341	2.92483
5077.C	5	Isoflavone reductase or phenylcoumaran benzylic ether reductase Rossman-fold NAD(P)-binding protein	2.65542	ND	10.3881	11.9902	3.72412	7.57276	7.8295	5.36555	33.7399	44.2804
5393.C	5	XM_001699290	ND	ND	7.96573	7.87378	5.4798	7.19196	11.0891	ND	15.8662	12.8768
2698.C	5	XM_001697755	ND	ND	1.82731	1.80577	ND	ND	ND	3.28841	2.07518	2.43833
8240.D	5	Hypothetical protein	ND	ND	1.94537	1.82674	1.60601	ND	1.29163	3.37818	2.51254	3.07615
7237.C	5	Cre16.g677550	ND	ND	1.47819	1.59674	2.76647	ND	ND	ND	ND	3.6164
1480.C	5	CGL73, Expressed protein conserved in the green lineage	ND	ND	2.33981	2.0283	ND	1.54666	ND	1.87576	4.30059	3.65718
9781.E	5	Hypothetical protein	ND	ND	2.82632	2.333	ND	ND	ND	ND	2.80266	2.33602
3545.C	5	Cre05.g242700	ND	ND	1.96237	1.6765	ND	ND	ND	1.32316	ND	2.23441
8320.D	5	Cre06.g283800	ND	ND	2.44932	1.79925	ND	ND	ND	ND	ND	ND
7725.D	5	Hypothetical protein	ND	ND	1.77923	1.48892	1.87528	1.48448	1.58843	ND	2.03217	2.31919
9930.E	5	transient receptor potential ion channel	0.822592	ND	2.06748	1.63772	ND	ND	ND	ND	4.6908	3.68777
7403.C	5	Cre17.g702350	1.25469	ND	1.22693	1.99488	ND	ND	ND	1.47468	ND	2.57634
8948.E	5	Cre03.g201850	ND	ND	ND	2.63378	1.65585	ND	ND	1.5823	2.39513	1.76568
5002.C	5	XM_001701289	ND	ND	ND	2.54153	ND	ND	ND	ND	2.01904	4.44557
1621.C	5	Not found	ND	ND	ND	2.04798	ND	NA	ND	ND	2.22291	3.07701
4118.C	5	Cre07.g323950, prolyl 4 hydroxylase alpha subunit	ND	ND	ND	1.61141	1.2551	ND	NA	7.1156	ND	7.47398
1137.C	5	Cre06.g294200, NAD-dependent DNA ligase adenylation domain and NAD-dependent DNA ligase OB-fold domain	ND	ND	8.77813	ND	NA	NA	NA	NA	ND	16.3663
8864.D	5	Cre12.g546950	ND	ND	1.50357	ND	1.92465	2.37358	ND	ND	2.06715	1.91931
8122.D	5	Hypothetical protein	ND	ND	1.31551	ND	ND	ND	ND	ND	1.93855	2.51005
6547.C	5	TIG1, chloroplast trigger protein	ND	ND	1.74829	ND	ND	ND	ND	1.87963	2.13642	3.33247
3428.C	6	Not found	ND	2.13319	0.501866	0.476113	ND	3.45357	ND	0.630725	ND	ND
1148.C	6	XM_001690733, Hypothetical protein	ND	1.59081	ND	0.641818	ND	ND	ND	0.525497	0.599793	0.456946
9682.E	6	Cre13.g580000,	ND	7.11923	ND	1.78817	0.21915	0.38872	ND	0.342048	ND	ND
2701.C	6	Cre01.g029450, nucleosome binding factor SPN	ND	2.6827	ND	1.48725	ND	ND	ND	ND	4.26669	3.15049
9093.E	6	XM_001693587	ND	3.77988	ND	ND	0.769703	ND	ND	0.39008	ND	ND
4877.C	6	Hypothetical protein	ND	2.94286	ND	ND	ND	ND	ND	ND	ND	ND
3220.C	6	Cre03.g178700,	ND	1.89573	ND	ND	ND	ND	2.19937	2.54793	3.0416	3.91939
1466.C	6	Cre16.g677750	ND	1.72138	ND	ND	ND	ND	1.63256	ND	2.52588	2.63241
7213.C	6	XM_001702673	0.679524	2.88954	ND	1.20587	ND	ND	ND	ND	1.70065	ND
698.C	7	Aldo/keto reductase	ND	ND	ND	ND	ND	ND	ND	ND	3.71998	7.44867
9.A	7	HPD2, 4 hydroxyphenylpyruvate dioxygenase	ND	ND	ND	ND	ND	ND	NA	ND	NA	5.62936
3023.C	7	Cre06.g273900	ND	ND	ND	ND	ND	ND	ND	ND	ND	2.96389
5098.C	7	Cre02.g113900	ND	ND	ND	ND	ND	ND	ND	ND	ND	2.87308
599.C	7	Not found	ND	ND	ND	ND	ND	ND	ND	ND	ND	2.88585
2878.C	7	Cre13.g578200	ND	ND	ND	ND	ND	NA	NA	3.82911	2.96794	2.29942
5633.C	7	Phosphatidylglycerophosphate synthase like protein	ND	ND	ND	ND	ND	ND	ND	3.30568	3.5513	3.30769
2858.C	7	Hypothetical protein	ND	ND	ND	ND	ND	3.12283	2.17823	1.87053	3.45125	4.37708
9318.E	7	Hypothetical protein	ND	ND	ND	ND	ND	ND	ND	ND	3.22817	2.301
980.C	7	Cre05.g245259	ND	ND	ND	ND	ND	ND	ND	ND	2.254	2.33484
2173.C	7	Cre13.g603950, Cyclophilin type peptidyl-prolyl cis-trans isomerase/CLD	ND	ND	ND	ND	ND	ND	ND	ND	2.94613	2.94167
9621.E	7	Hypothetical protein	ND	ND	ND	ND	ND	2.01901	ND	ND	3.79164	1.86294
4444.C	7	Not found	ND	ND	ND	ND	ND	2.24786	ND	4.09311	2.80756	ND
3329.C	7	Cre17.g726700, acyl-CoA synthetase	ND	ND	ND	ND	1.38086	ND	2.18871	9.08325	2.17729	2.55346
2580.C	7	Cre16.g668150	ND	ND	ND	ND	ND	ND	NA	3.36082	ND	ND
7736.D	7	Multiple matches	ND	ND	ND	ND	ND	ND	ND	2.91901	ND	ND
7786.D	7	Cre12.g519700	ND	ND	ND	ND	ND	2.0785	4.09382	3.63345	ND	2.52048
1308.C	7	XRP14, Ribonuclease P	ND	ND	ND	ND	ND	ND	5.5341	6.36807	ND	3.61871
4114.C	7	PDXK1, pyridoxal kinase	ND	ND	ND	ND	ND	ND	4.07422	3.69357	1.93253	ND
1175.C	7	CGL26	ND	ND	ND	ND	1.86114	3.01298	4.60794	ND	ND	ND
8949.E	7	Cre12.g485750	ND	ND	ND	ND	ND	ND	4.02558	ND	ND	ND
9187.E	7	XM_001692959 CHRD superfamily	ND	ND	ND	ND	1.5826	2.33751	ND	0.646632	0.320418	0.402597
3075.C	7	Not found	ND	ND	ND	ND	2.27739	4.7842	ND	ND	2.40762	1.83536
5009.C	7	Cre08.g373450, amylase	ND	ND	ND	ND	1.67483	2.4083	ND	ND	ND	ND
7124.C	7	Hypothetical protein	ND	ND	ND	ND	1.61436	2.4653	ND	ND	1.35756	ND
2624.C	7	Cre08.g359700, lipoic acid synthetase	ND	ND	ND	ND	1.73893	5.53272	ND	ND	ND	ND
8045.D	7	Cre17.g696350	ND	ND	ND	ND	1.90953	4.30413	ND	ND	1.38989	ND
6049.C	7	Cre02.g102400, RNA polymerase III	ND	ND	ND	ND	ND	4.35592	ND	ND	1.27889	ND
5676.C	7	Cre03.g184400, hydrolase	ND	ND	ND	ND	ND	3.56869	NA	NA	NA	ND
3771.C	7	XM_001694265, no conserved domain	ND	ND	ND	ND	3.11274	1.59841	ND	ND	ND	0.804846
128.A	7	CCP2, low CO2 inducible, chl. envelope protein	ND	ND	ND	ND	5.26221	4.8533	ND	ND	ND	ND
5599.C	8	Hypothetical protein	ND	ND	ND	ND	0.471673	0.27204	0.0565271	0.126824	0.138962	0.400381
1020.C	8	Cre06.g303171	ND	ND	ND	ND	ND	0.0544348	ND	ND	0.155202	0.243305
1374.C	8	Cre04.g219300	ND	ND	ND	ND	0.3689	0.25051	0.335233	ND	0.476205	0.566839
1281.C	8	Not found	ND	ND	ND	ND	0.393794	0.347768	ND	0.500996	0.440762	ND
8192.D	8	CGL28, RNA binding protein Splicing factor 3b, subunit 4	ND	ND	ND	ND	ND	ND	0.329844	0.280752	0.276645	0.369895
9199.E	8	Cre06.g273900	ND	ND	ND	ND	ND	0.471971	ND	0.461427	0.55263	0.415448
9009.E	8	XM_001690383	ND	ND	ND	ND	0.753466	0.424986	ND	0.301467	0.332591	0.326499
2481.C	8	CGLD16	ND	ND	ND	ND	0.462426	0.483447	ND	0.318134	0.456025	0.40618
4274.C	8	Cre03.g195300	ND	ND	ND	ND	0.578226	ND	ND	0.62144	0.373595	0.267133
1520.C	8	FAP61, Flagellar Associated Protein	ND	ND	ND	ND	ND	ND	ND	0.296032	0.496444	0.620248
8184.D	8	Cre01.g003950	ND	ND	ND	ND	ND	ND	ND	0.31736	ND	ND
7101.C	8	Cre17.g722550	ND	ND	ND	ND	ND	ND	ND	0.284396	ND	ND
9629.E	8	Cre12.g535250	ND	ND	ND	ND	ND	ND	ND	0.277461	ND	0.520169
1597.C	8	Cre26.g772900	ND	ND	ND	ND	ND	ND	0.349408	0.543262	0.593137	0.59431
2310.C	8	XM_001699495	ND	ND	ND	ND	0.708314	0.667722	0.358321	ND	0.37088	ND
728.C	8	XM_001694479	ND	ND	ND	ND	ND	ND	0.303041	ND	0.541391	ND
2260.C	9	Cre18.g745250, Cysteine-rich secretory protein family	ND	0.311128	0.751927	0.606356	0.169041	0.374416	0.17179	0.175715	0.397858	0.538652
6797.C	9	Cre12.g492850	ND	0.218071	ND	ND	ND	ND	0.190002	ND	ND	ND
2065.C	9	Hypothetical protein	0.679055	0.272684	ND	ND	ND	ND	ND	ND	0.629962	ND
7018.C	9	Hypothetical protein	0.69512	0.55397	ND	ND	0.37333	0.378661	ND	0.224673	ND	0.342881
2068.C	9	Cre08.g362600	0.593049	0.650427	ND	ND	0.276928	0.142943	0.203276	0.171776	0.306873	0.223112
7483.C	9	XM_001702686	0.320554	0.333447	ND	ND	0.585771	0.677983	0.347301	0.258989	0.486041	0.466161
3146.C	9	Cre01.g028450, radical SAM family	ND	ND	0.413831	ND	ND	ND	ND	ND	ND	ND
2383.C	9	Cre13.g588950	0.645094	ND	0.710963	ND	0.408758	0.323104	ND	0.40429	0.495448	ND
916.C	9	Cre06.g273100	ND	0.797466	ND	0.5997	ND	ND	0.746607	ND	0.425319	0.483847
1472.C	9	Cre08.g361200	ND	ND	ND	0.712899	ND	ND	ND	0.328752	0.573536	ND
3412.C	9	Cre12.g520000	ND	ND	ND	0.702491	2.29954	8.51969	ND	ND	ND	ND
8740.D	9	UPM1, SAM dependent uroporphyrinogen III methyltransferase	ND	ND	ND	0.633541	ND	ND	ND	ND	0.404704	ND
3909.C	9	Cre03.g196250, cysteine protease family c1 related	0.764764	ND	ND	0.560761	1.41129	ND	ND	ND	0.372967	0.245278
4628.C	9	Hypothetical protein	0.596708	0.603503	0.433281	ND	0.648412	ND	0.612926	0.447427	0.47918	0.378462
1461.C	10	XM_001703732, no conserved domain but conserved sequence PLESWGDI	ND	ND	0.558587	0.339589	ND	ND	ND	ND	ND	ND
7931.D	10	Hypothetical protein	ND	ND	0.703786	0.572415	ND	0.75279	ND	ND	0.393068	0.379485
2078.C	10	Cre06.g308750	ND	0.542112	0.650441	0.488213	ND	1.29961	0.630864	ND	0.579949	0.337475
3247.C	10	Cre04.g226500	ND	0.638837	0.64034	0.460152	0.621639	ND	0.581931	0.462614	0.476233	0.344168
4509.C	11	Cre03.g184950	0.764347	0.687313	0.474159	0.537815	0.740641	ND	ND	ND	0.588522	0.457796
5866.C	11	Lipopolysaccharide modifying enzyme	0.744576	0.645155	0.421125	0.442033	ND	ND	ND	0.513239	0.641801	ND
1090.C	11	XM_001698245 with WW and GYF domains	0.644554	0.486771	0.370425	0.296445	ND	ND	ND	ND	0.565341	0.506996
828.C	11	Cre07.g323850	0.725413	0.688595	0.50536	0.360493	ND	ND	ND	ND	0.546128	0.52096
4032.C	11	Cre01.g061050	0.768446	0.687524	0.522155	0.430264	0.924691	ND	ND	ND	0.639198	0.609184
8651.D	11	Hypothetical protein	0.720939	0.659393	0.470403	0.383318	ND	ND	ND	ND	0.646223	0.504739
3727.C	11	Not found	0.684548	0.649707	0.412455	0.316207	0.555383	ND	0.553475	0.398868	0.351911	0.257276
715.C	11	Hypothetical protein	0.639051	0.568502	0.396328	0.323514	0.693011	ND	0.635813	0.504631	0.478406	0.355619
3507.C	11	Cre74.g795150, prolyl oligopeptidase family	0.678017	0.695535	0.516409	0.403822	ND	ND	ND	ND	0.658881	0.584821
7794.D	11	Tropomyosin	0.581929	0.580148	0.401756	0.295195	ND	ND	0.641397	ND	0.526545	0.501799
3828.C	11	CGLD22, ATP synthase I like	0.670426	0.672512	0.588358	0.386971	0.700492	ND	ND	ND	0.672641	0.656735
1534.C	11	Cre07.g315500	0.643944	0.668588	0.541119	0.403242	ND	ND	ND	ND	0.574372	0.47969
1571.C	11	Cre17.g731466	0.542804	0.617339	0.44843	0.278034	ND	ND	ND	ND	0.512332	0.485284
1440.C	11	PRL9, cysteine rich secretory protein	0.685135	0.606832	0.603914	0.397259	0.797037	0.893729	ND	ND	0.554191	0.604203
3369.C	11	ANK21	0.616682	0.626204	0.489582	0.462586	0.830618	ND	0.614836	0.509155	0.751631	ND
8159.D	11	XM_001696826	0.544588	0.54923	0.379998	0.372286	ND	ND	ND	ND	0.509261	0.510925
9174.E	11	Cre08.g362100,	0.525822	0.547577	0.362696	0.329709	0.698196	ND	0.570711	0.489391	0.422017	0.308196
1522.C	11	Cre16.g649250,	0.49839	0.553246	0.390032	0.400061	0.575658	ND	ND	0.425337	0.41257	0.405471
5573.C	11	Hypothetical protein	0.668566	0.58241	0.560319	0.516665	ND	ND	0.348843	0.258711	0.389277	0.486755
6689.C	11	Hypothetical protein	0.594457	0.525423	0.413553	0.390653	ND	ND	ND	0.516748	0.592362	0.48782
3486.C	11	LIC1, ligand gated ion channel	0.587436	0.514315	0.429541	0.381611	ND	ND	ND	ND	0.575677	0.519463
7769.D	11	Cre03.g168950	0.557999	0.514634	0.456759	0.390259	0.695167	ND	ND	ND	0.518451	0.474444
615.C	11	XM_001701946, mitochondrial carrier domains protein (Arabidopsis folate carrier 26%)	0.521321	0.478965	0.458347	0.405032	ND	0.667176	0.698331	0.52062	0.434138	0.447493
4981.C	11	Cre01.g017750	0.494962	0.5517	0.412656	0.343276	0.699826	ND	0.586418	0.503602	0.575621	0.504723
5404.C	11	Hypothetical protein	0.544062	0.681596	0.509762	0.415054	0.713088	ND	0.640504	ND	0.618984	0.627073
3226.C	11	NOP56, pre mRNA processing ribonucleoprotein	0.622609	0.452819	0.484019	0.390108	ND	ND	ND	ND	ND	ND
7351.C	11	Cre11.g467400,	0.634791	0.53147	0.608817	0.524821	ND	ND	0.56352	ND	0.401617	0.352742
2249.C	11	Cre19.g753950	0.457509	0.428417	0.360973	0.411406	ND	ND	ND	ND	ND	ND
161.A	11	Protein kinase with CBS domains	0.448965	0.373607	0.556552	0.368675	0.472695	0.39156	0.221174	0.236557	0.268827	0.280892
9998.E	11	XM_001697504	0.337219	0.132972	0.271946	0.253391	0.716288	0.604292	0.256248	0.163671	0.0639779	0.312589
5535.C	12	Not found	0.722898	ND	0.529857	0.407014	ND	ND	ND	ND	0.605133	0.518892
2192.C	12	Hypothetical protein	0.660612	ND	0.48129	0.355778	ND	ND	ND	0.469931	0.453362	0.324158
7032.C	12	Cre11.g472350	0.676143	ND	0.493343	0.323897	ND	ND	ND	ND	0.64771	0.583746
4410.C	12	XM_001691394	0.670142	ND	0.478536	0.428009	0.669003	ND	ND	0.500258	0.493002	0.392423
5617.C	12	Cre07.g321350	0.548105	ND	0.416118	0.454027	0.578941	0.601041	0.487346	0.498132	0.39818	0.423061
4313.C	12	Cre14.g619350	0.609085	ND	0.596731	0.652861	0.558926	0.453299	0.430132	0.558845	0.36704	0.485596
9422.E	12	XM_001693069	0.477594	ND	0.531294	0.574013	0.614214	0.628273	0.463313	0.406084	0.550464	0.487633
9866.E	12	XM_001692532	0.529059	0.600009	0.688096	0.686562	0.4995	0.328832	0.39576	0.526386	ND	ND
4130.C	12	XM_001699688, no putative conserved domain	0.238284	0.422823	0.416148	0.423764	ND	ND	0.457992	0.49957	ND	0.723961
9631.E	12	Cre01.g029450	0.714261	ND	ND	0.806572	ND	ND	0.8087	2.56475	1.26599	1.35126
7661.D	12	Not found	0.71437	ND	ND	ND	ND	0.373925	ND	ND	ND	ND
7410.C	12	Cre01.g003950	0.5667	ND	ND	ND	1.85715	ND	0.355616	0.329325	0.378804	ND
4902.C	12	Hypothetical protein	0.283221	ND	ND	ND	ND	ND	ND	ND	ND	ND
264.A	10	FLA8, Kinesin II motor subunit	ND	0.580023	0.456803	0.406172	1.36684	1.38028	ND	0.447009	0.351428	0.443314
